# Supplementary material for: Nanogold-Carried Graphene Oxide: Anti-Inflammation and Increased Differentiation Capacity of Mesenchymal Stem Cells
Source: MDPI journal article supplement (doi:10.3390/nano11082046), 2021-08-11
Supplement: s1 [file s1]

Figure S1

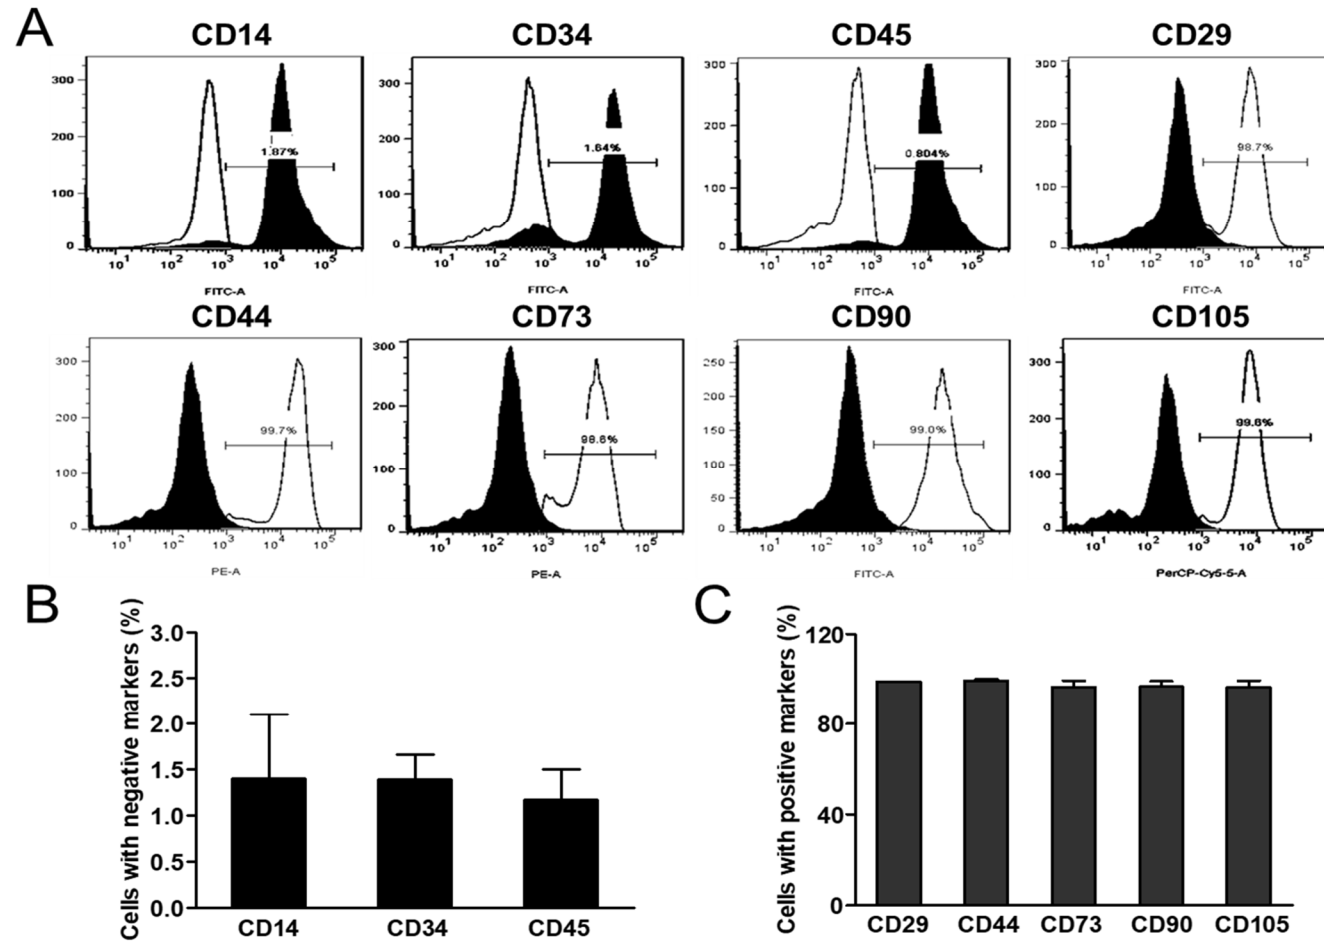

**Figure S1. Characterization of MSCs using a flow cytometry analysis.** (A) Cells were harvested and incubated with the respective antibody conjugated with fluorescein isothiocyanate (FITC), phycoerythrin (PE) and/or PerCP-Cy5.5, against the indicated markers: CD14-FITC, CD29- FITC, CD34-FITC, CD44-PE, CD45-FITC, CD73-PE, CD90-FITC, and CD105-PerCP-Cy5.5 (BD Pharmingen, USA). Filled area represents isotype controls. (B) The quantification of CD14, CD34 and CD45 by Flow Cytometry. (C) The quantification data of CD29, CD44, CD73, CD90 and CD105 expression.

**Figure S2**

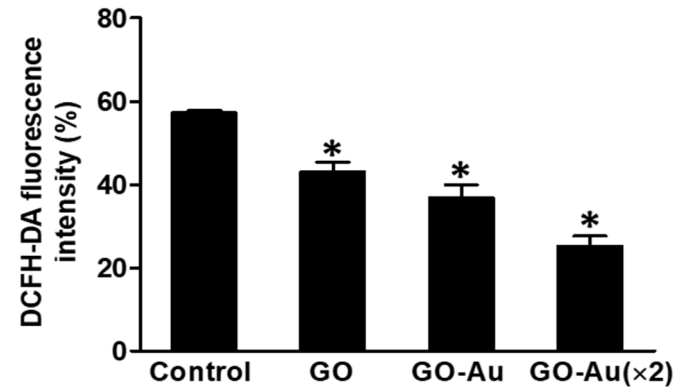

**Figure S2. Effects of different materials on intracellular ROS generation.** (A) The MSCs were cultured on various nanomaterials of GO, GO-Au and GO-Au (×2) for 24 h. The cells were incubated with 10  $\mu$ M of DCFH-DA for 30 min, and then harvested and subjected to ROS generation using a flow cytometry analysis. (B) The intracellular ROS generation was recorded and quantified through detected the DCFH-DA fluorescence intensity. The data were expressed as means  $\pm$  SD of three independent experiments. \*  $p < 0.05$ .

**Figure S3**

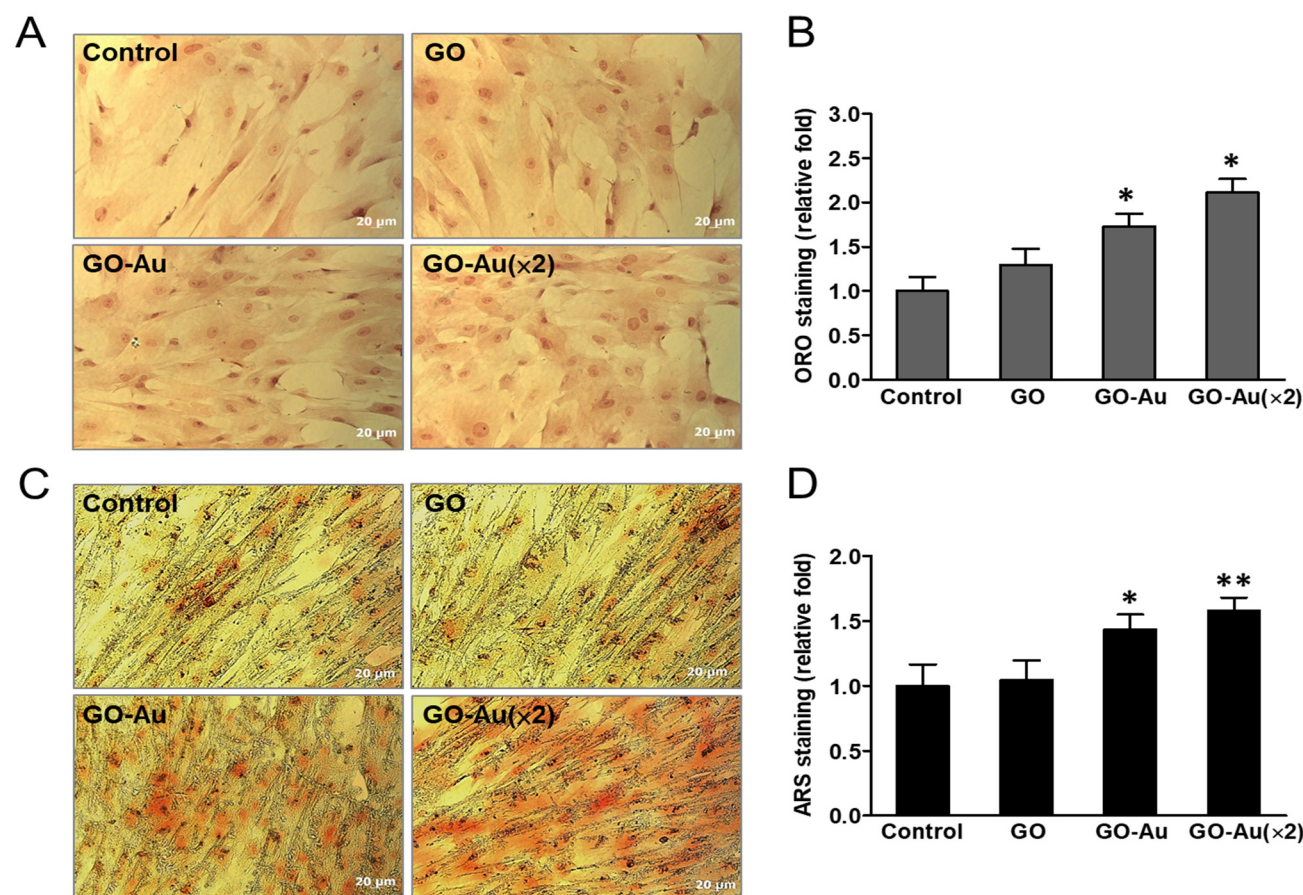

**Figure S3. Characterization of GO-Au-mediated MSCs differentiation into adipocytes and osteocytes.** Cells were cultured on various nanomaterials of GO, GO-Au and GO-Au ( $\times 2$ ) for 7 days. MSCs were then estimated (A-B) the adipocyte differentiation and (C-D) the osteogenic differentiation using Oil-Red O (ORO) staining assay and Alizarin Red S (ARS) staining analysis, respectively. The number of ORO-positive adipocytes was counted and recorded from a given area on the culture slides. The quantification of osteogenic differentiation was obtained from absorbance of the de-stained ARS supernatant and measured at 450 nm using the microplate reader. Data were presented as the mean  $\pm$  SD, \*  $p < 0.05$ , \*\*  $p < 0.01$ .
